# Explaining Global Increases in Water Use Efficiency: Why Have We Overestimated Responses to Rising Atmospheric CO<sub>2</sub> in Natural Forest Ecosystems?

Lucas C. R. Silva, William R. Horwath\*

Biogeochemistry and Nutrient Cycling Laboratory, Department of Land, Air and Water Resources (LAWR), University of California Davis, Davis, California, United States of America

## Abstract

**Background:** The analysis of tree-ring carbon isotope composition ( $\delta^{13}\text{C}$ ) has been widely used to estimate spatio-temporal variations in intrinsic water use efficiency (iWUE) of tree species. Numerous studies have reported widespread increases in iWUE coinciding with rising atmospheric CO<sub>2</sub> over the past century. While this could represent a coherent global response, the fact that increases of similar magnitude were observed across biomes with no apparent effect on tree growth raises the question of whether iWUE calculations reflect actual physiological responses to elevated CO<sub>2</sub> levels.

**Methodology/Results:** Here we use Monte Carlo simulations to test if an artifact of calculation could explain observed increases in iWUE. We show that highly significant positive relationships between iWUE and CO<sub>2</sub> occur even when simulated data (randomized  $\delta^{13}\text{C}$  values spanning the observed range) are used in place of actual tree-ring  $\delta^{13}\text{C}$  measurements. From simulated data sets we calculated non-physiological changes in iWUE from 1900 to present and across a 4000 m altitudinal range. This generated results strikingly similar to those reported in recent studies encompassing 22 species from tropical, subtropical, temperate, boreal and mediterranean ecosystems. Only 6 of 49 surveyed case studies showed increases in iWUE significantly higher than predicted from random values.

**Conclusions/Significance:** Our results reveal that increases in iWUE estimated from tree-ring  $\delta^{13}\text{C}$  occur independently of changes in  $^{13}\text{C}$  discrimination that characterize physiological responses to elevated CO<sub>2</sub>. Due to a correlation with CO<sub>2</sub> concentration, which is used as an independent factor in the iWUE calculation, any tree-ring  $\delta^{13}\text{C}$  data set would inevitably generate increasing iWUE over time. Therefore, although consistent, previously reported trends in iWUE do not necessarily reflect a coherent global response to rising atmospheric CO<sub>2</sub>. We discuss the significance of these findings and suggest ways to distinguish real from artificial responses in future studies.

**Citation:** Silva LCR, Horwath WR (2013) Explaining Global Increases in Water Use Efficiency: Why Have We Overestimated Responses to Rising Atmospheric CO<sub>2</sub> in Natural Forest Ecosystems? PLoS ONE 8(1): e53089. doi:10.1371/journal.pone.0053089

**Editor:** Jerome Chave, Centre National de la Recherche Scientifique, France

**Received:** June 13, 2012; **Accepted:** November 27, 2012; **Published:** January 14, 2013

**Copyright:** © 2013 Silva and Horwath. This is an open-access article distributed under the terms of the Creative Commons Attribution License, which permits unrestricted use, distribution, and reproduction in any medium, provided the original author and source are credited.

**Funding:** The authors have no support or funding to report.

**Competing Interests:** The authors have declared that no competing interests exist.

\* E-mail: wrhorwath@ucdavis.edu

## Introduction

Anthropogenic activities have substantially altered atmospheric composition and climate with important implications for terrestrial biomes. Forest ecosystems are expected to be the most responsive, as tree species show higher increases in productivity and greater reductions in transpiration than any other functional type measured in large-scale (e.g. FACE sites) elevated CO<sub>2</sub> experiments [1,2]. These results are consistent with early chamber experiments and confirm that the intrinsic water use efficiency (iWUE) of trees, or the ratio between carbon uptake and water loss through transpiration, increases as stomatal conductance decreases in response to elevated CO<sub>2</sub> [1]. In natural ecosystems, analyses of iWUE through the examination of carbon isotope ratios ( $\delta^{13}\text{C}$ ) in tree-rings have also indicated increasing trends in response to rising atmospheric CO<sub>2</sub> concentration [3–7]. However, contrasting with experimental studies, long-term changes in iWUE estimated from tree-ring  $\delta^{13}\text{C}$  have not been related to enhanced tree growth. Nearly identical increases in iWUE have been

reported across biomes [8], but inconsistent tree growth responses and, in many cases, overall decline have been observed [9,10].

These findings have generally been interpreted as evidence of large scale (warming-induced) drought stress, which despite CO<sub>2</sub> stimulation, may lead to increased iWUE while limiting tree growth [6,8]. Recent studies have, however, called attention to methodological issues that could hinder an accurate physiological interpretation of responses to rising CO<sub>2</sub> based on the classic calculation of iWUE from tree-ring  $\delta^{13}\text{C}$ . For example, it has been suggested that due to a correlation with CO<sub>2</sub>, increases in iWUE would occur regardless of source to product (i.e. atmosphere to plant biomass) changes in isotopic fractionation that characterize physiological responses to environmental change [9]. If confirmed, this would indicate that temporal changes in iWUE estimated from tree-ring  $\delta^{13}\text{C}$  do not reflect actual shifts in either carbon uptake or water loss through transpiration. More importantly, it would imply that responses to rising CO<sub>2</sub> have been globally

overestimated, possibly explaining the lack of a clear effect on tree growth.

In this paper, we examine whether artifacts of calculation could explain increasing trends in iWUE reported in the recent literature. We use simulated (random)  $\delta^{13}\text{C}$  data and classic equations to determine how iWUE values relate to  $\text{CO}_2$  levels when there is no physiological change in source to product  $^{13}\text{C}$  fractionation. Based on simulated tree-ring  $\delta^{13}\text{C}$  data and actual atmospheric  $\delta^{13}\text{C}$  and  $\text{CO}_2$  measurements, we calculate changes in iWUE over the past century and across a wide altitudinal range. We then compare responses generated from simulated data with results from actual tree-ring  $\delta^{13}\text{C}$  obtained from the recent literature. We discuss our results and their implications for future research, focusing on the significance of previously observed responses and suggesting ways to validate changes in iWUE, testing the effect of atmospheric  $\text{CO}_2$  on natural forest ecosystems.

## Methods

### Water use efficiency calculation

The most widely used method to estimate changes in iWUE in natural ecosystems is the analysis of stable carbon isotope ratios ( $\delta^{13}\text{C}$ ) in tree-rings [11]. The  $^{13}\text{C}/^{12}\text{C}$  ratio in trees, and other  $\text{C}_3$  plants, is controlled at the leaf level by the ratio of intercellular ( $C_i$ ) to ambient ( $C_a$ )  $\text{CO}_2$  concentrations. If  $C_i$  is high relative to  $C_a$ , strong discrimination against  $^{13}\text{C}$  yields isotopically light ( $^{12}\text{C}$  enriched) biomass. Conversely, if  $C_i$  is low there is less discrimination against  $^{13}\text{C}$  resulting in higher  $\delta^{13}\text{C}$  values. Regardless of growth rates or net changes in productivity, any change in carboxylation and/or stomatal conductance that alters  $C_i/C_a$  is recorded as a change in  $\delta^{13}\text{C}$  [12], which in the case of tree species that produce annual growth rings can be used to reconstruct physiological changes over long periods of time [11,13]. Because atmospheric  $\delta^{13}\text{C}$  also varies over time, tree-rings must be analyzed in relation to atmospheric  $^{13}\text{C}$  abundance at the moment of its assimilation. For example, anthropogenic  $\text{CO}_2$  emissions have decreased the  $\delta^{13}\text{C}$  composition of the atmosphere [14], as fossil fuels (depleted in  $^{13}\text{C}$ ) result in a reduction of  $^{13}\text{CO}_2$  relative to  $^{12}\text{CO}_2$ . Therefore, physiological changes that occur in coincidence with anthropogenic emissions can only be assessed after changes in atmosphere to plant biomass discrimination are accounted for, which is done as follows [15]:

$$\Delta^{13}\text{C} = (\delta^{13}\text{C}_{\text{air}} - \delta^{13}\text{C}_{\text{plant}}) / (1 + \delta^{13}\text{C}_{\text{plant}}/1000) \quad (1)$$

where  $\Delta^{13}\text{C}$  is discrimination against  $^{13}\text{C}$ ,  $\delta^{13}\text{C}_{\text{air}}$  is the carbon isotope ratio of air (the source) and  $\delta^{13}\text{C}_{\text{plant}}$  is the carbon isotope ratio of the product (plant biomass). To be translated into physiologically relevant information  $\Delta$  can be expressed as:

$$\Delta^{13}\text{C} = a + (b - a)(C_i/C_a) \quad (2)$$

where  $a$  is the discrimination against  $^{13}\text{CO}_2$  during diffusion through the stomata ( $-4.4\%$ ) and  $b$  is the net discrimination due to carboxylation ( $-27\%$ ). Real increases in carboxylation rates or reduction in conductance, expected in responses to rising  $\text{CO}_2$  levels, would result in a distinct shift in  $\Delta^{13}\text{C}$  [12]. Following Fick's first law ( $A = g\text{CO}_2(C_a - C_i)$ ),  $\Delta^{13}\text{C}$  values can be converted into plant's intrinsic water use efficiency (iWUE) at the moment of biomass production [11] as follows:

$$iWUE = A/g = C_a[1 - (C_i/C_a)] \cdot 0.625 \quad (3)$$

where  $A$  is net carboxylation,  $g$  is the leaf stomatal conductance and 0.625 is the relation between conductance for  $\text{CO}_2$  molecules and water vapor.

### Calculating iWUE from simulated $\delta^{13}\text{C}$

To test whether correlations involved in the calculation of iWUE could explain systematic (non-physiological) increases in response to rising  $\text{CO}_2$ , we used Monte Carlo randomizations [16], generating one thousand synthetic  $\delta^{13}\text{C}_{\text{plant}}$  data sets that are similar (vary within the same range) to observed tree-ring data. This method allowed us to build a probability distribution and study what features of the distribution are essential for describing previously reported (observed) patterns. The underlying assumption is that the simulated distribution represents the observed data well enough so that variation in randomized and measured data is the same. Real tree-ring  $\delta^{13}\text{C}$  ranges from about  $-20$  to  $-30\%$ , which typically corresponds to water-stressed and unstressed conditions respectively. To represent different portions of this spectrum, we used simulations of  $\delta^{13}\text{C}$  ranging from  $-20$  to  $-21\%$ ,  $-25$  to  $-26\%$  and  $-29$  to  $-30\%$ . At each range we calculated  $^{13}\text{C}$  discrimination ( $\Delta$ ) in relation to a constant atmospheric  $\delta^{13}\text{C}$  composition ( $-8\%$ ), determining changes in iWUE in response to atmospheric  $\text{CO}_2$  as the only varying factor.

### Changes over time and with altitude

To translate the outcomes of our simulated data into trends comparable with those reported in the recent literature, we calculated changes in iWUE from 1900 to present and across a 4000 m altitudinal range. To calculate iWUE over time we used actual atmospheric values of  $\delta^{13}\text{C}_{\text{air}}$  and  $C_a$  [14,15] and simulated tree-ring  $\delta^{13}\text{C}$  data sets. To describe changes in  $\text{CO}_2$  partial pressure and  $^{13}\text{C}$  content with altitude, we relied on well-established relationships between  $\delta^{13}\text{C}_{\text{plant}}$  and  $C_a$  partial pressure. Globally,  $\delta^{13}\text{C}_{\text{plant}}$  increases  $\sim 0.8\%$  for every 1000 m of altitudinal gain, a pattern that holds independently of plant species [17,18]. We used average iWUE obtained from simulated  $\delta^{13}\text{C}$  data coupled with  $^{13}\text{C}$  enrichment expected with altitude ( $\delta^{13}\text{C}_{\text{Alt}} = 0.0008 \cdot \text{Alt} + \delta^{13}\text{C}_{\text{plant}}$ ). We then constructed a simple three-dimensional model of changes in iWUE over the past century and across altitudinal gradients as follows:

$$iWUE = -67.0004 + 0.0023367 \text{ Alt} + 0.4561636 \text{ CO}_2 \quad (4)$$

where temporal changes in iWUE ( $\mu\text{mol mol}^{-1}$ ) are a function of both  $\text{CO}_2$  (ppm) and altitude (m). We then regressed annual percent increases in iWUE calculated from simulated data sets (predicted) against iWUE measured from tree-ring  $\delta^{13}\text{C}$  (observed) in 49 recent studies encompassing 22 species from tropical, subtropical, temperate, boreal and mediterranean ecosystems (Table S1). Significant differences were tested using the difference between observed iWUE distributions of each surveyed case study in relation to predicted iWUE, using 95% confidence levels. Statistical analysis and Monte Carlo simulations were performed using JMP software for Macintosh, version 10.

## Results and Discussion

### iWUE calculated from simulated data

Simulated  $\delta^{13}\text{C}$  data (Fig. 1A), used in place of actual tree-ring  $\delta^{13}\text{C}$ , generated highly significant positive relationships between iWUE and atmospheric  $\text{CO}_2$ . Despite constant atmosphere to biomass discrimination ( $\Delta$ ) (Fig. 1B), which is a universal measure of physiological responses to environmental change [19], iWUE calculated from simulated  $\delta^{13}\text{C}$  always increased along with  $\text{CO}_2$

levels (Fig. 1C). Randomizations within constant  $\delta^{13}\text{C}$  ranges, such as the ones used here, reflect what would be observed if  $C_i$  increased proportionally with  $C_a$  or, in other words, if  $C_i/C_a$  was kept constant as  $C_a$  rises. This corresponds to the most conservative theoretical scenario for increases in iWUE [20], where  $\delta^{13}\text{C}$  and  $\Delta$  do not change (eqs. 1 and 2) and changes in iWUE are derived from variation in  $\text{CO}_2$  alone (eq. 3). The graphic (average) expression of simulated  $\delta^{13}\text{C}$  as estimated iWUE shows increases of more than  $40 \mu\text{mol mol}^{-1}$  over the last century and about  $20 \mu\text{mol mol}^{-1}$  across altitudinal gradients (Fig. 2). This demonstrates that large increases in iWUE would be observed in association with calendar year and altitude in any data set, regardless of actual physiological responses. Plant regulation of  $A$  and/or  $g$ , which could actively keep  $C_i$  constant as  $\text{CO}_2$  levels rise leading to increased iWUE and  $\delta^{13}\text{C}$  due to reduced  $C_i/C_a$  and  $\Delta$  [3,7], is not represented by our  $\delta^{13}\text{C}$  randomizations. If such regulations were to be considered in a theoretical scenario of constant  $C_i$ , increases in iWUE greater than those generated by our model would be observed [20].

### Observed versus predicted responses

Predicted responses based on simulated data sets generate results remarkably similar to those determined from actual tree-ring  $\delta^{13}\text{C}$  data, suggesting that previously reported trends in iWUE do not represent an implicit physiological response to rising  $\text{CO}_2$ . Several case studies [3–7] (see also supplementary material) and meta-analyses of tree-ring  $\delta^{13}\text{C}$  [8,9] have concluded that synchronous increases in iWUE, typically 0.3–0.5% per year, have occurred over the past century. Annual changes in iWUE calculated from simulated  $\delta^{13}\text{C}$  show increases of similar magnitude (Fig. 2), which are linearly related with empirical data (Fig. 3A). Global analyses of tree-rings have identified distinct responses associated with latitude [9]. However, when simulated results are subtracted from observed iWUE data, only 6 out of 49 case studies show significant increases; furthermore, all latitudinal trends disappear (Fig. 3B). These findings suggest that an overall acclimation, rather than enhanced efficiency, was the predominant response over the past century across biomes.

Mechanisms controlling leaf [21,22] and ecosystem [1,23] level acclimation have been described experimentally and both

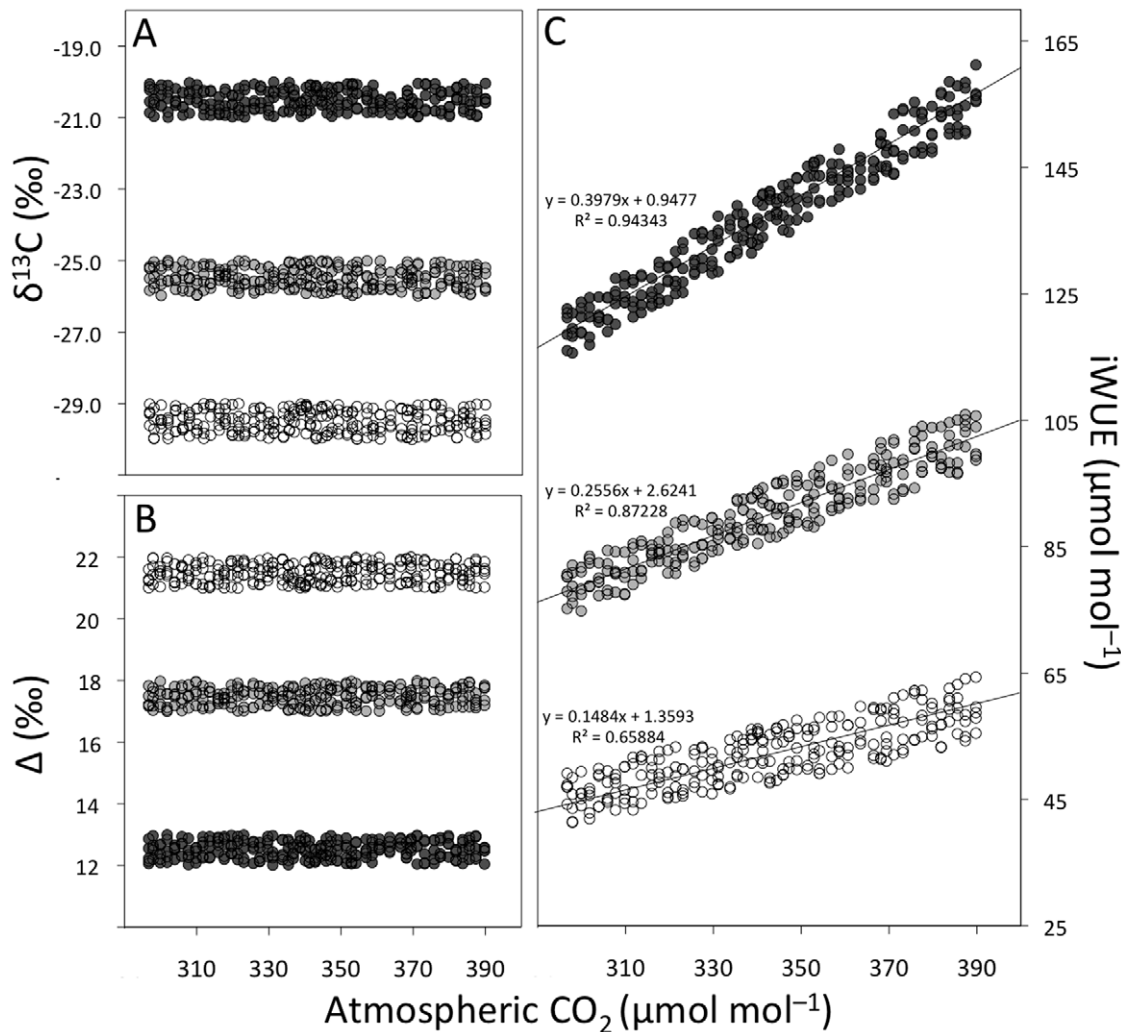

**Figure 1. Simulated  $\delta^{13}\text{C}$  data, randomized within three different ranges:  $-20$  to  $-21\%$  (dark grey circles);  $-25$  to  $-26\%$  (light grey circles) and  $-29$  to  $-30\%$  (white circles).** (A). Source to product  $^{13}\text{C}$  discrimination calculated from simulated  $\delta^{13}\text{C}$  according to eq. 2 using atmospheric  $\delta^{13}\text{C}$  value of  $-8\%$  (B). Estimated iWUE calculated from simulated  $\delta^{13}\text{C}$  and  $\Delta$  following eq. 3 (C). Note that significant ( $P < 0.001$ ) positive relationships between iWUE and atmospheric  $\text{CO}_2$  occur despite no changes in  $\delta^{13}\text{C}$  and  $\Delta$ . doi:10.1371/journal.pone.0053089.g001

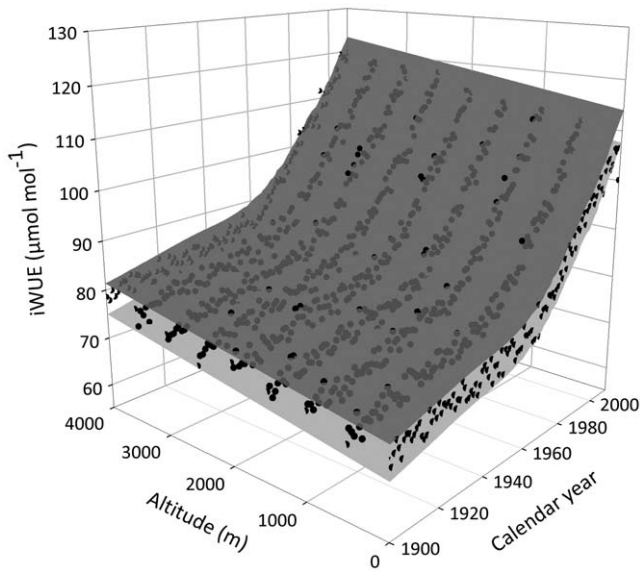

**Figure 2. Average increase in intrinsic water use efficiency (iWUE) calculated from simulated  $\delta^{13}\text{C}$  data sets (Fig. 1) using classic equations (eqs. 1 to 3) and actual values of atmospheric  $\delta^{13}\text{C}$  and  $\text{CO}_2$  concentrations [14,15].** Black circles represent predicted iWUE values and surfaces show upper and lower (95%) confidence intervals for changes in iWUE estimated through time (calendar year) and across a 4000 m altitudinal gradient as function of  $\text{CO}_2$  according to eq. 4.  
doi:10.1371/journal.pone.0053089.g002

productivity and water use responses have been shown to vary with length of exposure to elevated  $\text{CO}_2$ . Reduced/acclimated stimulation of net carbon assimilation (A) has been generally attributed to decreased carboxylation velocity and investment in Rubisco [1]. Similarly, long-term hydraulic acclimation under elevated  $\text{CO}_2$  allows plants to reduce stomatal conductance ( $g$ ) less than plants growing under ambient  $\text{CO}_2$  [24]. If under natural conditions both A and  $g$  acclimate as suggested by experimental

results, maintenance rather than continuous increases in iWUE should be observed as a result of decadal to centennial  $\text{CO}_2$  stimulation. Our comparisons between predicted and observed iWUE data suggest that this occurred in most case studies surveyed here. The few cases that showed increases in iWUE significantly higher than predicted by simulated data include deciduous and coniferous species, growing in temperate and tropical regions ranging from 100 to about 1600 m asl (Table S1). No obvious reason could be found to explain why these studies showed higher iWUE than predicted. Nevertheless, the observed idiosyncratic trends suggest the importance of site- and species-specific responses.

**Significance and implications for future research**

To date, divergent patterns found between iWUE and growth have been interpreted as evidence of warming-induced water stress, which could explain both reduced productivity and enhanced water efficiency [3–8]. Where growth rates appear to be positively related to iWUE, results have been interpreted as evidence of  $\text{CO}_2$  stimulation [6,9]. However, here we show that due to an artifact of calculation systematic increases in iWUE would be inevitably generated by any  $\delta^{13}\text{C}$  data set and, as such, are not causally linked to either growth decline or stimulation. On the basis of isotope theory,  $\delta^{13}\text{C}$  in tree-rings varies in response to changes in conditions that affect processes controlling photosynthesis and/or transpiration during the year in which the ring was formed [11]. Hence, analysis of  $\delta^{13}\text{C}$  in tree-rings offers valuable information to study how environmental changes affect tree development and water use over time. While we agree with the theory and the well-established association found between  $\delta^{13}\text{C}$  and leaf-level physiological processes [12,17,18], our results show that the extrapolation of this association from tree-ring  $\delta^{13}\text{C}$  should be reevaluated.

Stable isotopes in tree-rings have now been measured in many parts of the world. Though substantial, inter- and intra-specific differences in  $^{13}\text{C}$  discrimination [3,5,7,13] and variation across altitudinal and latitudinal gradients [9,17,18] have been overlooked in most iWUE studies. Global estimates of iWUE

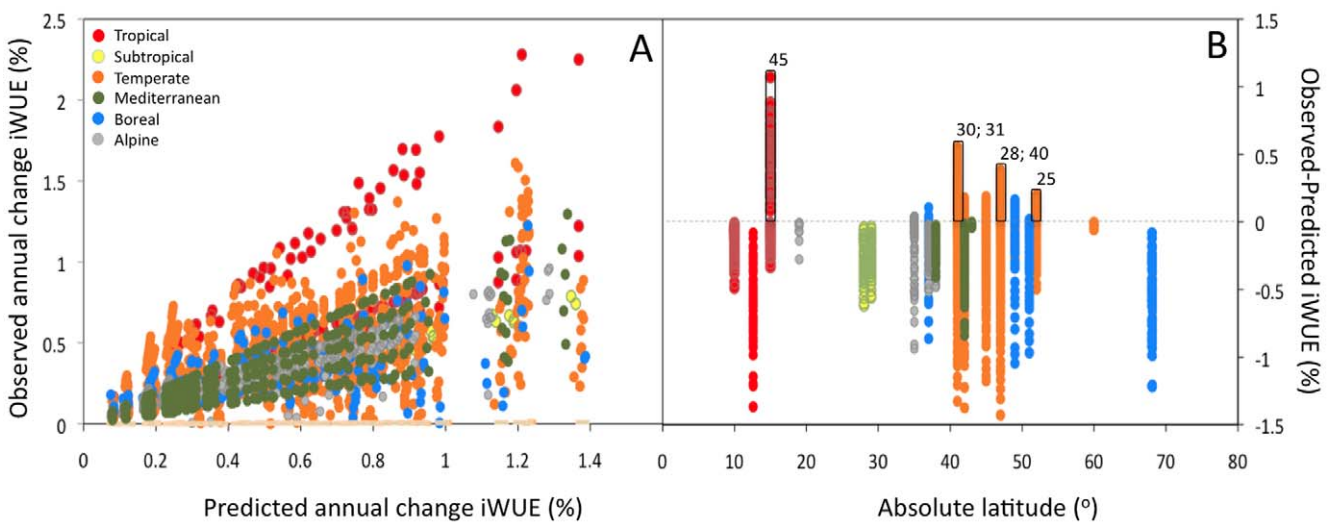

**Figure 3. Relationships between iWUE predicted based on simulated  $\delta^{13}\text{C}$  values (Fig. 1), corrected for changes with calendar year and altitude (Fig. 2), and iWUE observed from in 49 case studies.** (A). Difference between observed and predicted change in iWUE (B). Note that only six case studies, namely 25, 28, 30, 31, 40 and 45 (Table S1) showed increases in iWUE significantly higher than predicted from simulated  $\delta^{13}\text{C}$  data (upper 95% confidence interval across latitudes in panel B=0.3%).  
doi:10.1371/journal.pone.0053089.g003

integrated over the past decades, without accounting for such variability, suggest that increases of the same magnitude with no significant differences occurred across biomes [8]. Our simulations, however, show that these consistent trends in iWUE cannot be interpreted as a coherent global response to rising CO<sub>2</sub>. Most of the responses observed in the surveyed studies could be explained by a correlation with CO<sub>2</sub> (Fig. 3), suggesting that physiological responses have been overestimated.

Complementary methods should be used in combination with iWUE analysis to distinguish real from artificial effects and improve spatio-temporal scaling of the impacts of climate and atmospheric change on terrestrial systems. The analysis of source to product <sup>13</sup>C fractionation combined with tree radial growth, or the calculation of response contrast based on cumulative changes in iWUE and productivity, can be used to distinguish between CO<sub>2</sub> fertilization effects and warming-induced stress [9]. Other isotopic tracers related to water use, such as δ<sup>18</sup>O, could also be used for this purpose [11]. While δ<sup>13</sup>C does not provide any indication of whether changes in iWUE are due to changes in photosynthesis or transpiration, if tree-ring δ<sup>18</sup>O increases with δ<sup>13</sup>C this would indicate that changes in iWUE were caused by reductions in stomatal conductance rather than increases in photosynthesis [5,25]. If source to product <sup>13</sup>C discrimination, growth or δ<sup>18</sup>O data are not available, comparisons between empirically determined iWUE and theoretical baselines generated from simulated data sets (Fig. 2, but see also [20]), could be used to control for artificial trends in future studies.

## References

- Ainsworth EA, Long SP (2005) What have we learned from 15 years of free-air CO<sub>2</sub> enrichment (FACE)? A meta-analytic review of the responses of photosynthesis, canopy. *New Phytologist* 165: 351–371.
- Huang J-G, Bergeron Y, Denneker B, Berninger F, Tardif J (2007) Response of Forest Trees to Increased Atmospheric CO<sub>2</sub>. *Critical Reviews in Plant Sciences* 26: 265–283. doi:10.1080/07352680701626978.
- Silva LCR, Anand M, Oliveira JM, Pillar VD (2009) Past century changes in *Araucaria angustifolia* (Bertol.) Kuntze water use efficiency and growth in forest and grassland ecosystems of southern Brazil: implications for forest expansion. *Global Change Biology* 15: 2387–2396. doi:10.1111/j.1365-2486.2009.01859.x.
- Andreu-Hayles L, Planells O, Gutiérrez E, Muntan E, Helle G, et al. (2011) Long tree-ring chronologies reveal 20th century increases in water-use efficiency but no enhancement of tree growth at five Iberian pine forests. *Global Change Biology* 17: 2095–2112. doi:10.1111/j.1365-2486.2010.02373.x.
- Nock CA, Baker PJ, Wanek W, Leis A, Grabner M, et al. (2011) Long-term increases in intrinsic water-use efficiency do not lead to increased stem growth in a tropical monsoon forest in western Thailand. *Global Change Biology* 17: 1049–1063. doi:10.1111/j.1365-2486.2010.02222.x.
- Silva LCR, Anand M, Leithead MD (2010) Recent Widespread Tree Growth Decline Despite Increasing Atmospheric CO<sub>2</sub>. *PLoS ONE* 5: 7.
- Peñuelas J, Hunt JM, Ogaya R, Jump AS (2008) Twentieth century changes of tree-ring δ<sup>13</sup>C at the southern range-edge of *Fagus sylvatica*: increasing water-use efficiency does not avoid the growth decline induced by warming at low altitudes. *Global Change Biology* 14: 1076–1088. doi:10.1111/j.1365-2486.2008.01563.x.
- Peñuelas J, Canadell JG, Ogaya R (2010) Increased water-use efficiency during the 20th century did not translate into enhanced tree growth. *Global Ecology and Biogeography* 20: 597–608. doi:10.1111/j.1466-8238.2010.00608.x.
- Silva LCR, Anand M (2012) Probing for the influence of atmospheric CO<sub>2</sub> and climate change on forest ecosystems across biomes. *Global Ecology and Biogeography*. doi:10.1111/j.1466-8238.2012.00783.x.
- Gedalof Z, Berg AA (2010) Tree ring evidence for limited direct CO<sub>2</sub> fertilization of forests over the 20th century. *Global Biogeochem Cycles* 24: GB3027.
- McCarroll D, Loader NJ (2004) Stable isotopes in tree rings. *Quaternary Science Reviews* 23: 771–801. doi:10.1016/j.quascirev.2003.06.017.
- Farquhar GD, Ehleringer JR, Hubick KT (1989) Carbon Isotope Discrimination and Photosynthesis. *Annual Review of Plant Physiology and Plant Molecular Biology* 40: 503–537. doi:10.1146/annurev.pp.40.060189.002443.
- Anderson WT, Sternberg LSL, Pinzon MC, Gann-Troxler T, Childers DL, et al. (2005) Carbon isotopic composition of cypress trees from South Florida and changing hydrologic conditions. *Dendrochronologia* 23: 1–10.

## Supporting Information

### Table S1 List of case studies that reported physiological changes in response to rising atmospheric CO<sub>2</sub>. (\*)

Indicates studies where annual percent change in iWUE was reported in the original text; (\*\*) indicates studies where only δ<sup>13</sup>C series were presented. In all case studies iWUE was determined based on tree-ring δ<sup>13</sup>C following classic calculations (eq. 1 to 3) and using real values of atmospheric δ<sup>13</sup>C and CO<sub>2</sub> concentrations [14,15]. The equation that best describes the relationship between iWUE and CO<sub>2</sub> series in each case study and the period of the observation are shown. From these relationships annual percent changes were calculated to project iWUE values over the past century (Fig. 3). (DOC)

## Acknowledgments

We thank Mark Leithead and Valerio de Patta Pillar of the Laboratory of Quantitative Ecology UFRGS (Brazil), Madhur Anand and other members of the Global Ecological Change Laboratory at the University of Guelph (Canada) for valuable discussion.

## Author Contributions

Conceived and designed the experiments: LS. Performed the experiments: LS WH. Analyzed the data: LS WH. Contributed reagents/materials/analysis tools: WH. Wrote the paper: LS WH.

- Observatory ML, Reports OI, Co S (2011) Data Management Plan Atmospheric CO<sub>2</sub> Concentrations, Mauna Loa Observatory, Hawaii, 2011–2013. Data Management: 4–5.
- McCarroll D, Gagen MH, Loader NJ, Robertson I, Anchukaitis KJ, et al. (2009) Correction of tree ring stable carbon isotope chronologies for changes in the carbon dioxide content of the atmosphere. *Geochimica et Cosmochimica Acta* 73: 1539–1547. doi:10.1016/j.gca.2008.11.041.
- Manly BFJ (2007) Randomization, bootstrap and Monte Carlo methods in biology. Chapman & Hall/CRC. p.
- Körner C, Farquhar GD, Roksandic Z (1988) A global survey of carbon isotope discrimination in plants from high altitude. *Oecologia* 74: 623–632. doi:10.1007/BF00380063.
- Körner C, Farquhar GD, Wong SC (1991) Carbon isotope discrimination by plants follows latitudinal and altitudinal trends. *Oecologia* 88: 30–40. doi:10.1007/BF00328400.
- Farquhar GD, O'Leary MH, Berry JA (1982) On the Relationship between Carbon Isotope Discrimination and the Inter-cellular Carbon Dioxide Concentration in Leaves. *Australian journal of plant physiology* 9: 121–137.
- Linares JC, Camarero J (2011) From pattern to process: linking intrinsic water-use efficiency to drought-induced forest decline. *Global Change Biology*: n/a–n/a. doi:10.1111/j.1365-2486.2011.02566.x.
- Bloom AJ, Burger M, Rubio Asensio JS, Cousins AB (2010) Carbon dioxide enrichment inhibits nitrate assimilation in wheat and *Arabidopsis*. *Science* (New York, NY) 328: 899–903. doi:10.1126/science.1186440.
- Bloom AJ, Smart DR, Nguyen DT, Scarles PS (2002) Nitrogen assimilation and growth of wheat under elevated carbon dioxide. *Proceedings of the National Academy of Sciences of the United States of America* 99: 1730–1735. doi:10.1073/pnas.022627299.
- Finzi AC, Moore DJP, DeLucia EH, Lichten J, Hofmoeckel KS, et al. (2006) Progressive nitrogen limitation of ecosystem processes under elevated CO<sub>2</sub> in a warm-temperate forest. *Ecology* 87: 15–25.
- Domec J-C, Palmroth S, Ward E, Maier CA, Thérézien M, et al. (2009) Acclimation of leaf hydraulic conductance and stomatal conductance of *Pinus taeda* (loblolly pine) to long-term growth in elevated CO<sub>2</sub> (free-air CO<sub>2</sub> enrichment) and N-fertilization. *Plant cell environment* 32: 1500–1512.
- Ewe SML, Da Silveira Lobo Sternberg L, Busch DE (1999) Water-use patterns of woody species in pineland and hammock communities of South Florida. *Forest Ecology and Management* 118: 139–148. doi:10.1016/S0378-1127(98)00493-9.
